# Supplementary material for: Exposure to Contemporary and Emerging Chemicals in Commerce among Pregnant Women in the United States: The Environmental influences on Child Health Outcome (ECHO) Program
Source: PubMed Central journal article supplement — Environ Sci Technol. 2022 May 10;56(10):6560–73. doi: 10.1021/acs.est.1c08942 (PMC9118548; doi:10.1021/acs.est.1c08942), 2022-05-10
Supplement: es1c08942_si_001.pdf [file es1c08942_si_001.pdf]

## SUPPORTING INFORMATION 1

### **Exposure to contemporary and emerging chemicals in commerce among pregnant women in the United States: The Environmental influences on Child Health Outcomes (ECHO) Program**

Jessie P. Buckley, Jordan R. Kuiper, Deborah H. Bennett, Emily S. Barrett, Tracy Bastain, Carrie V. Breton, Sridhar Chinthakindi, Anne L. Dunlop, Shohreh F. Farzan, Julie B. Herbstman, Margaret R. Karagas, Carmen J. Marsit, John D. Meeker, Rachel Morello-Frosch, Thomas G. O'Connor, Megan E. Romano, Susan Schantz, Rebecca J. Schmidt, Deborah J. Watkins, Hongkai Zhu, Edo D. Pellizzari, Kurunthachalam Kannan, and Tracey J. Woodruff on behalf of program collaborators for Environmental influences on Child Health Outcomes

**Pages: 15**

**Figures: 1**

**Tables: 4**

**Table S1.** Characteristics of Participating ECHO Pregnancy Cohorts (N = 9)

**Table S2.** Description of Measured Parent Compounds, Chemicals, Individual Analytes, and Composite Analytes

**Table S3.** Coefficients of Variation (CVs) of Quality Control (QC) Pooled Samples (A and B) and Median Relative Percent Differences (RPDs) of Blinded Duplicate Pairs

**Table S4.** Sociodemographic characteristics of pregnant women in the study sample, the nine participating cohorts, and 68 ECHO cohorts

**Figure S1.** Violin plot of  $\log_2$ -transformed urinary analyte concentrations measured among 171 pregnant women in ECHO

**Table S1.** Characteristics of Participating ECHO Pregnancy Cohorts (N = 9)

| Cohort name                                                                                    | Location(s)                | Years of cohort enrollment (current study) | Recruitment timing and eligibility criteria                                                                                                                                                                                                                                                                                                                                                                                                                                                                                                          | Cohort features                                                                                                             | Number in pilot study | Number of blinded duplicates |
|------------------------------------------------------------------------------------------------|----------------------------|--------------------------------------------|------------------------------------------------------------------------------------------------------------------------------------------------------------------------------------------------------------------------------------------------------------------------------------------------------------------------------------------------------------------------------------------------------------------------------------------------------------------------------------------------------------------------------------------------------|-----------------------------------------------------------------------------------------------------------------------------|-----------------------|------------------------------|
| Chemicals in Our Bodies (CiOB) <sup>1-4</sup>                                                  | San Francisco, California  | 2014–present (2014–2018)                   | Women seeking routine prenatal care and delivery services from three University of California, San Francisco hospitals were recruited at 12–28 weeks of pregnancy. Eligibility criteria included English or Spanish speakers, singleton birth, >=18 years of age, no major pregnancy complications.                                                                                                                                                                                                                                                  | Cohort is urban, racially and economically diverse, with 38% non-Hispanic White, 34% Latina, 19% Asian, and 8% Black women. | 20                    | 2                            |
| Illinois Kids Developmental Study (IKIDS) <sup>4</sup>                                         | Champaign-Urbana, Illinois | 2013–present (2019)                        | Women were recruited from two obstetric clinics at their first prenatal visit and enrolled at 10–14 weeks of gestation. Eligibility criteria included 18–40 years of age, not caring multiples, not in a high-risk pregnancy, fluent in English, not planning to leave the area before the child’s first birthday.                                                                                                                                                                                                                                   | Cohort is from a mid-size mid-western college town, predominantly non-Hispanic White and college-educated.                  | 17                    | 2                            |
| Maternal and Developmental Risks from Environmental and Social Stressors (MADRES) <sup>5</sup> | Los Angeles, California    | 2015–present (2016–2019)                   | Recruitment from community health centers in urban Los Angeles with a focus on medically underserved populations. Eligibility for participants at the time of recruitment included: (1) less than 30 weeks pregnant, (2) at least 18 years of age, and (3) a fluent speaker of English or Spanish. Exclusion criteria for the study included: (1) multiple gestation; (2) having a physical, mental, or cognitive disability that would prevent participation or ability to provide consent; (3) current incarceration; and (4) HIV positive status. | Participants are predominantly Hispanic and approximately 50% were born outside of the U.S.                                 | 20                    | 2                            |
| Understanding Pregnancy Signals and Infant                                                     | Rochester, New York        | 2015–2019 (2019–2020)                      | 1st trimester recruitment from academic-affiliated prenatal clinics with an underserved patient population. Eligibility criteria included: <14 weeks of gestation,                                                                                                                                                                                                                                                                                                                                                                                   | Enriched for maternal sociodemographic diversity and psychosocial stress through recruitment at                             | 20                    | 0                            |

| Cohort name                                                                          | Location(s)             | Years of cohort enrollment (current study) | Recruitment timing and eligibility criteria                                                                                                                                                                                                                                                                                                                                                       | Cohort features                                                      | Number in pilot study | Number of blinded duplicates |
|--------------------------------------------------------------------------------------|-------------------------|--------------------------------------------|---------------------------------------------------------------------------------------------------------------------------------------------------------------------------------------------------------------------------------------------------------------------------------------------------------------------------------------------------------------------------------------------------|----------------------------------------------------------------------|-----------------------|------------------------------|
| Development (UPSIDE) <sup>6</sup>                                                    |                         |                                            | >=18 years of age, singleton pregnancy, no known substance abuse issues or history of psychotic illness, no major endocrine disorder, high-risk health condition, or significant obstetric concern at baseline.                                                                                                                                                                                   | clinics serving disproportionately high-need patients.               |                       |                              |
| Puerto Rico Testsite for Exploring Contamination Threats (PROTECT) <sup>7, 8 9</sup> | Northern Puerto Rico    | 2011-present (2017–2018)                   | Women recruited at prenatal care visit. Eligibility criteria included <20 weeks of gestation, age 18–40 years, residence in Northern Karst region of Puerto Rico, no IVF or major pre-existing medical conditions (e.g. diabetes).                                                                                                                                                                | Hispanic cohort.                                                     | 20                    | 0                            |
| Atlanta African American Maternal-Child Cohort <sup>10-12</sup>                      | Atlanta, Georgia        | 2014 – present (2016–2018)                 | Pregnant women 18–40 years of age who self-reported as Black or African American, were born in the United States, had a singleton pregnancy at 8–14 weeks of gestation presenting for care at clinics affiliated with Emory University (Emory and Grady Health Systems) and who did not have IVF or pre-existing chronic medical conditions were invited to participate.                          | Black/African American cohort from metropolitan Atlanta.             | 20                    | 0                            |
| Markers of Autism Risk in Babies: Learning Early Signs (MARBLES) <sup>13</sup>       | Northern California     | 2006-present (2008–2015)                   | Pregnant women were eligible if they had a child or other first degree relative with autism spectrum disorder (ASD), were 18 years of age or older, spoke, read, and understood English, and lived within 2.5 hours of the Davis/Sacramento region at the time of enrollment. The families were primarily recruited from those who received state-funded services for ASD in Northern California. | Mothers of a child with autism.                                      | 14                    | 6                            |
| Fair Start                                                                           | New York City, New York | 2013-present (2017–2019)                   | Pregnant women were enrolled from community obstetric clinics associated with New York Presbyterian Hospital. Eligibility criteria included English or Spanish                                                                                                                                                                                                                                    | Urban residents of upper Manhattan and South Bronx, mainly Hispanic. | 20                    | 20                           |

| Cohort name                                                | Location(s)             | Years of cohort enrollment (current study) | Recruitment timing and eligibility criteria                                                                                                                                                                                                                                                                                                                  | Cohort features                                                                                                                                                              | Number in pilot study | Number of blinded duplicates |
|------------------------------------------------------------|-------------------------|--------------------------------------------|--------------------------------------------------------------------------------------------------------------------------------------------------------------------------------------------------------------------------------------------------------------------------------------------------------------------------------------------------------------|------------------------------------------------------------------------------------------------------------------------------------------------------------------------------|-----------------------|------------------------------|
| New Hampshire Birth Cohort Study (NHBCS) <sup>14, 15</sup> | Concord and Lebanon, NH | 2009-present (2017–2019)                   | speakers, singleton birth, >=18 years old, and no major pregnancy complications.<br>Pregnant women 18–45 years of age were recruited at either ~12 weeks or ~24–28 weeks of gestation from prenatal clinics in New Hampshire. Eligibility criteria included English literacy, use of a private, unregulated water system at home, and a singleton pregnancy. | Participants are representative of the vulnerable group of rural pregnant women and are primarily non-Hispanic White, reflective of the underlying population of the region. | 20                    | 2                            |

## References

- Morello-Frosch, R.; Cushing, L. J.; Jesdale, B. M.; Schwartz, J. M.; Guo, W.; Guo, T.; Wang, M.; Harwani, S.; Petropoulou, S. E.; Duong, W.; Park, J. S.; Petreas, M.; Gajek, R.; Alvaran, J.; She, J.; Dobraca, D.; Das, R.; Woodruff, T. J., Environmental Chemicals in an Urban Population of Pregnant Women and Their Newborns from San Francisco. *Environ Sci Technol* **2016**, *50*, (22), 12464-12472.
- Eick, S. M.; Hom Thepaksorn, E. K.; Izano, M. A.; Cushing, L. J.; Wang, Y.; Smith, S. C.; Gao, S.; Park, J. S.; Padula, A. M.; DeMicco, E.; Valeri, L.; Woodruff, T. J.; Morello-Frosch, R., Associations between prenatal maternal exposure to per- and polyfluoroalkyl substances (PFAS) and polybrominated diphenyl ethers (PBDEs) and birth outcomes among pregnant women in San Francisco. *Environ Health* **2020**, *19*, (1), 100.
- Wang, A.; Gerona, R. R.; Schwartz, J. M.; Lin, T.; Sirota, M.; Morello-Frosch, R.; Woodruff, T. J., A Suspect Screening Method for Characterizing Multiple Chemical Exposures among a Demographically Diverse Population of Pregnant Women in San Francisco. *Environ Health Perspect* **2018**, *126*, (7), 077009.
- Eick, S. M.; Enright, E. A.; Geiger, S. D.; Dzwilewski, K. L. C.; DeMicco, E.; Smith, S.; Park, J. S.; Aguiar, A.; Woodruff, T. J.; Morello-Frosch, R.; Schantz, S. L., Associations of Maternal Stress, Prenatal Exposure to Per- and Polyfluoroalkyl Substances (PFAS), and Demographic Risk Factors with Birth Outcomes and Offspring Neurodevelopment: An Overview of the ECHO.CA.IL Prospective Birth Cohorts. *Int J Environ Res Public Health* **2021**, *18*, (2).
- Bastain, T. M.; Chavez, T.; Habre, R.; Girguis, M. S.; Grubbs, B.; Toledo-Corral, C.; Amadeus, M.; Farzan, S. F.; Al-Marayati, L.; Lerner, D.; Noya, D.; Quimby, A.; Twogood, S.; Wilson, M.; Chatzi, L.; Cousineau, M.; Berhane, K.; Eckel, S. P.; Lurmann, F.; Johnston, J.; Dunton, G. F.; Gilliland, F.; Breton, C., Study Design, Protocol and Profile of the Maternal And Developmental Risks from Environmental and Social Stressors (MADRES) Pregnancy Cohort: a Prospective Cohort Study in Predominantly Low-Income Hispanic Women in Urban Los Angeles. *BMC Pregnancy Childbirth* **2019**, *19*, (1), 189.

6. O'Connor, T.; Best, M.; Brunner, J.; Ciesla, A. A.; Cuning, A.; Kapula, N.; Kautz, A.; Khoury, L.; Macomber, A.; Meng, Y.; Miller, R. K.; Murphy, H.; Salafia, C. M.; Vallejo Sefair, A.; Serrano, J.; Barrett, E.; study, U., Cohort profile: Understanding Pregnancy Signals and Infant Development (UPSIDE): a pregnancy cohort study on prenatal exposure mechanisms for child health. *BMJ Open* **2021**, *11*, (4), e044798.
7. Ferguson, K. K.; Rosen, E. M.; Rosario, Z.; Feric, Z.; Calafat, A. M.; McElrath, T. F.; Velez Vega, C.; Cordero, J. F.; Alshawabkeh, A.; Meeker, J. D., Environmental phthalate exposure and preterm birth in the PROTECT birth cohort. *Environ Int* **2019**, *132*, 105099.
8. Ashrap, P.; Watkins, D. J.; Mukherjee, B.; Boss, J.; Richards, M. J.; Rosario, Z.; Velez-Vega, C. M.; Alshawabkeh, A.; Cordero, J. F.; Meeker, J. D., Maternal blood metal and metalloid concentrations in association with birth outcomes in Northern Puerto Rico. *Environ Int* **2020**, *138*, 105606.
9. Manjourides, J.; Zimmerman, E.; Watkins, D. J.; Carpenito, T.; Velez-Vega, C. M.; Huerta-Montanez, G.; Rosario, Z.; Ayala, I.; Vergara, C.; Feric, Z.; Ondras, M.; Suh, H. H.; Gu, A. Z.; Brown, P.; Cordero, J. F.; Meeker, J. D.; Alshawabkeh, A., Cohort profile: Center for Research on Early Childhood Exposure and Development in Puerto Rico. *BMJ Open* **2020**, *10*, (7), e036389.
10. Dunlop, A. L.; Knight, A. K.; Satten, G. A.; Cutler, A. J.; Wright, M. L.; Mitchell, R. M.; Read, T. D.; Mulle, J.; Hertzberg, V. S.; Hill, C. C.; Smith, A. K.; Corwin, E. J., Stability of the vaginal, oral, and gut microbiota across pregnancy among African American women: the effect of socioeconomic status and antibiotic exposure. *PeerJ* **2019**, *7*, e8004.
11. Brennan, P. A.; Dunlop, A. L.; Smith, A. K.; Kramer, M.; Mulle, J.; Corwin, E. J., Protocol for the Emory University African American maternal stress and infant gut microbiome cohort study. *BMC Pediatr* **2019**, *19*, (1), 246.
12. Dunlop, A. L.; Jordan, S. L.; Ferranti, E. P.; Hill, C. C.; Patel, S.; Hao, L.; Corwin, E. J.; Tangpricha, V., Total and Free 25-Hydroxy-Vitamin D and Bacterial Vaginosis in Pregnant African American Women. *Infect Dis Obstet Gynecol* **2019**, *2019*, 9426795.
13. Hertz-Picciotto, I.; Schmidt, R. J.; Walker, C. K.; Bennett, D. H.; Oliver, M.; Shedd-Wise, K. M.; LaSalle, J. M.; Giulivi, C.; Puschner, B.; Thomas, J.; Roa, D. L.; Pessah, I. N.; Van de Water, J.; Tancredi, D. J.; Ozonoff, S., A Prospective Study of Environmental Exposures and Early Biomarkers in Autism Spectrum Disorder: Design, Protocols, and Preliminary Data from the MARBLES Study. *Environ Health Perspect* **2018**, *126*, (11), 117004.
14. Gilbert-Diamond, D.; Emond, J. A.; Baker, E. R.; Korricks, S. A.; Karagas, M. R., Relation between in Utero Arsenic Exposure and Birth Outcomes in a Cohort of Mothers and Their Newborns from New Hampshire. *Environ Health Perspect* **2016**, *124*, (8), 1299-307.
15. Signes-Pastor, A. J.; Doherty, B. T.; Romano, M. E.; Gleason, K. M.; Gui, J.; Baker, E.; Karagas, M. R., Prenatal exposure to metal mixture and sex-specific birth outcomes in the New Hampshire Birth Cohort Study. *Environ Epidemiol* **2019**, *3*, (5).

**Table S2.** Description of Measured Parent Compounds, Chemicals, Individual Analytes, Composite Analytes, and Sums

| Chemical group                      | Number of chemicals* | Number of parent compounds** | Number of analytes (N=89)   |                                |                        |                           | Sums ( $\Sigma$ )*** |
|-------------------------------------|----------------------|------------------------------|-----------------------------|--------------------------------|------------------------|---------------------------|----------------------|
|                                     |                      |                              | Individual parent compounds | Composites of parent compounds | Individual metabolites | Composites of metabolites |                      |
| <b>Total</b>                        | <b>103</b>           | <b>73</b>                    | <b>41</b>                   | <b>2</b>                       | <b>38</b>              | <b>8</b>                  |                      |
| Bactericides                        | 1                    | 1                            | 1                           | 0                              | 0                      | 0                         |                      |
| Benzophenones                       | 6                    | 4                            | 3                           | 0                              | 3                      | 0                         |                      |
| Bisphenols                          | 7                    | 7                            | 7                           | 0                              | 0                      | 0                         |                      |
| Fungicides & herbicides             | 11                   | 11                           | 11                          | 0                              | 0                      | 0                         |                      |
| Insecticides                        | 19                   | 14                           | 9                           | 1                              | 6                      | 1                         |                      |
| Organophosphate esters              | 11                   | 8                            | 4                           | 1                              | 3                      | 1                         |                      |
| Parabens                            | 6                    | 6                            | 6                           | 0                              | 0                      | 0                         |                      |
| Phthalates & phthalate alternatives | 31                   | 18                           | 0                           | 0                              | 25                     | 3                         | 4                    |
| Polycyclic aromatic hydrocarbons    | 11                   | 4                            | 0                           | 0                              | 1                      | 3                         |                      |

\*Number of chemicals is the number of parent compounds and metabolites represented by the 89 analytes.

\*\*Number of parent compounds is the number of parent compounds represented by the 89 analytes.

\*\*\*We calculated a weighted molar sum ( $\Sigma$ ) of metabolites for di-2-ethylhexyl phthalate (DEHP), di-isodecyl phthalate (DiDP), di-(2-propylheptyl) phthalate (DPHP), and di-iso-nonyl-cyclohexane-1,2-dicarboxylic acid (DINCH). The metabolites included in each sum were measured individually and subsequently summed for analysis because they are biomarkers of the same parent compound.

**Table S3.** Coefficients of Variation (CVs) of Quality Control (QC) Pooled Samples (A and B) and Median Relative Percent Differences (RPDs) of Blinded Duplicate Pairs.

| Chemical group          | Chemical class | Analyte | Replicate pooled aliquots |                     |        | Duplicate sample aliquots |                |
|-------------------------|----------------|---------|---------------------------|---------------------|--------|---------------------------|----------------|
|                         |                |         | QC pool                   | # of valid QC pairs | CV (%) | # of valid pairs          | Median RPD (%) |
| Bactericide             | Bactericide    | TCC     | A                         | 0                   | NC     | 0                         | NC             |
|                         |                |         | B                         | 0                   | NC     |                           |                |
| Benzophenones           | Benzophenones  | BP2     | A                         | 0                   | NC     | < 5                       | 7.3            |
|                         |                |         | B                         | 0                   | NC     |                           |                |
| Benzophenones           | Benzophenones  | BP8     | A                         | 0                   | NC     | 11                        | 30.8           |
|                         |                |         | B                         | 0                   | NC     |                           |                |
| Benzophenones           | Benzophenones  | 4-OHBP  | A                         | 5                   | 12     | 27                        | 21.8           |
|                         |                |         | B                         | 6                   | 4      |                           |                |
| Benzophenones           | Benzophenones  | BP1     | A                         | 6                   | 4      | 32                        | 12.6           |
|                         |                |         | B                         | 6                   | 3      |                           |                |
| Benzophenones           | Benzophenones  | BP3     | A                         | 6                   | 9      | 32                        | 26.9           |
|                         |                |         | B                         | 6                   | 8      |                           |                |
| Bisphenols              | Bisphenols     | BPA     | A                         | 6                   | 16     | 14                        | 70.8           |
|                         |                |         | B                         | 6                   | 11     |                           |                |
| Bisphenols              | Bisphenols     | BPAF    | A                         | 0                   | NC     | 0                         | NC             |
|                         |                |         | B                         | 0                   | NC     |                           |                |
| Bisphenols              | Bisphenols     | BPB     | A                         | 0                   | NC     | 0                         | NC             |
|                         |                |         | B                         | 0                   | NC     |                           |                |
| Bisphenols              | Bisphenols     | BPF     | A                         | 0                   | NC     | 5                         | 38.4           |
|                         |                |         | B                         | 0                   | NC     |                           |                |
| Bisphenols              | Bisphenols     | BPS     | A                         | 6                   | 5      | 28                        | 18.3           |
|                         |                |         | B                         | 6                   | 2      |                           |                |
| Bisphenols              | Bisphenols     | BPZ     | A                         | 0                   | NC     | n < 5                     | 58.7           |
|                         |                |         | B                         | 0                   | NC     |                           |                |
| Fungicides & herbicides | Fungicides     | 2,4,5-T | A                         | 0                   | NC     | 18                        | 16.1           |
|                         |                |         | B                         | 0                   | NC     |                           |                |
| Fungicides & herbicides | Fungicides     | PNP     | A                         | 0                   | NC     | 15                        | 53.1           |
|                         |                |         | B                         | 0                   | NC     |                           |                |
| Fungicides &            | Fungicides     | MET     | A                         | 0                   | NC     | 0                         | NC             |



|                         |                 |                  |   |   |    |       |      |
|-------------------------|-----------------|------------------|---|---|----|-------|------|
| herbicides              |                 |                  | B | 0 | NC |       |      |
| Fungicides & herbicides | Fungicides      | PCP              | A | 0 | NC | 19    | 56.4 |
| Fungicides & herbicides | Fungicides      | PYRM             | B | 0 | NC | 0     | NC   |
| Fungicides & herbicides | Herbicides      | 2,4-D            | A | 0 | NC | n < 5 | 71.2 |
| Fungicides & herbicides | Herbicides      | ATZ              | B | 0 | NC |       |      |
| Insecticides            | Neonicotinoids  | 6-CNA            | A | 6 | 7  | 13    | 60.1 |
| Insecticides            | Neonicotinoids  | ACE              | B | 6 | 10 |       |      |
| Insecticides            | Neonicotinoids  | CLO              | A | 0 | NC | 0     | NC   |
| Insecticides            | Neonicotinoids  | IMI              | B | 0 | NC | 0     | NC   |
| Insecticides            | Neonicotinoids  | NDMA             | A | 0 | NC | n < 5 | 17.5 |
| Insecticides            | Neonicotinoids  | NIT              | B | 0 | NC | n < 5 | 82.1 |
| Insecticides            | Neonicotinoids  | THX              | A | 6 | 1  | 31    | 32.4 |
| Insecticides            | Neonicotinoids  | THX              | B | 6 | 2  |       |      |
| Insecticides            | Organochlorine  | 2,4,5-/2,4,6-TCP | A | 0 | NC | NC    | NC   |
| Insecticides            | Organochlorine  | 2,4,5-/2,4,6-TCP | B | 0 | NC | NC    | NC   |
| Insecticides            | Organophosphate | TCP              | A | 6 | 3  | 31    | 16.2 |
| Insecticides            | Organophosphate | TCP              | B | 6 | 1  |       |      |
| Insecticides            | Other           | SUF              | A | 0 | NC | n < 5 | 25.2 |
| Insecticides            | Other           | SUF              | B | 0 | NC | n < 5 | 25.2 |
| Insecticides            | Pyrethroids     | DCCA             | A | 0 | NC | n < 5 | 23   |
| Insecticides            | Pyrethroids     | DCCA             | B | 0 | NC | n < 5 | 23   |
| Insecticides            | Pyrethroids     | PBA              | A | 6 | 8  | n < 5 | 23   |
| Insecticides            | Pyrethroids     | PBA              | B | 6 | 12 |       |      |
| Insecticides            | Pyrethroids     | FPBA             | A | 0 | NC | n < 5 | 9.1  |
| Organophosphate         | Organophosphate | BDCIPP           | B | 0 | NC |       |      |
| Organophosphate         | Organophosphate | BDCIPP           | A | 0 | NC | 20    | 35.1 |

|                                     |                        |             |   |   |    |    |      |
|-------------------------------------|------------------------|-------------|---|---|----|----|------|
| esters                              | esters                 |             | B | 0 | NC |    |      |
| Organophosphate esters              | Organophosphate esters | DBuP/DiBP   | A | 0 | NC | 0  | NC   |
| Organophosphate esters              | Organophosphate esters | DPHP        | B | 0 | NC |    |      |
| Organophosphate esters              | Organophosphate esters | TEP         | A | 6 | 2  | 32 | 10   |
| Organophosphate esters              | Organophosphate esters | TnBP/TiBP   | B | 6 | 6  |    |      |
| Organophosphate esters              | Organophosphate esters | TCEP        | A | 0 | NC | 6  | 44.2 |
| Organophosphate esters              | Organophosphate esters | BzPB        | B | 0 | NC |    |      |
| Parabens                            | Parabens               | BuPB        | A | 0 | NC | 0  | NC   |
| Parabens                            | Parabens               | EtPB        | B | 0 | NC | 6  | 43.5 |
| Parabens                            | Parabens               | MePB        | A | 6 | 9  | 26 | 18.5 |
| Parabens                            | Parabens               | PrPB        | B | 6 | 8  |    |      |
| Phthalates & phthalate alternatives | Phthalate alternatives | MCOCH       | A | 6 | 1  | 33 | 17.2 |
| Phthalates & phthalate alternatives | Phthalate alternatives | MHNCH       | B | 6 | 4  | 28 | 9.8  |
| Phthalates & phthalate alternatives | Phthalate alternatives | MONCH       | A | 6 | 4  | 17 | 13.8 |
| Phthalates & phthalate alternatives | Phthalates             | MCMHP/MCHPP | B | 6 | 2  |    |      |
| Phthalates & phthalate alternatives | Phthalates             | MEHHP       | A | 1 | 1  | 20 | 9.7  |
|                                     |                        |             | B | 1 | 1  |    |      |
|                                     |                        |             | A | 6 | 1  | 5  | 11.9 |
|                                     |                        |             | B | 6 | 2  |    |      |
|                                     |                        |             | A | 0 | NC | 28 | 19.9 |
|                                     |                        |             | B | 0 | NC |    |      |
|                                     |                        |             | A | 6 | 4  | 33 | 10.6 |
|                                     |                        |             | B | 6 | 2  |    |      |

|                                     |            |        |   |   |    |       |      |
|-------------------------------------|------------|--------|---|---|----|-------|------|
| Phthalates & phthalate alternatives | Phthalates | MEOHP  | A | 6 | 5  | 32    | 12   |
|                                     |            |        | B | 6 | 2  |       |      |
| Phthalates & phthalate alternatives | Phthalates | MHPP   | A | 0 | NC | n < 5 | 22.9 |
|                                     |            |        | B | 0 | NC |       |      |
| Phthalates & phthalate alternatives | Phthalates | MPCHP  | A | 6 | 5  | 32    | 9.5  |
|                                     |            |        | B | 6 | 5  |       |      |
| Phthalates & phthalate alternatives | Phthalates | MPHHP  | A | 6 | 3  | 5     | 12   |
|                                     |            |        | B | 6 | 2  |       |      |
| Phthalates & phthalate alternatives | Phthalates | MPOHP  | A | 6 | 3  | 27    | 9.8  |
|                                     |            |        | B | 6 | 1  |       |      |
| Phthalates & phthalate alternatives | Phthalates | MECPP  | A | 6 | 4  | 34    | 10   |
|                                     |            |        | B | 6 | 3  |       |      |
| Phthalates & phthalate alternatives | Phthalates | MCOMOP | A | 6 | 15 | 23    | 42.8 |
|                                     |            |        | B | 6 | 3  |       |      |
| Phthalates & phthalate alternatives | Phthalates | MBzP   | A | 0 | NC | 10    | 14.5 |
|                                     |            |        | B | 0 | NC |       |      |
| Phthalates & phthalate alternatives | Phthalates | MCiNP  | A | 6 | 3  | 32    | 11.1 |
|                                     |            |        | B | 6 | 1  |       |      |
| Phthalates & phthalate alternatives | Phthalates | MCiOP  | A | 6 | 2  | 33    | 10.1 |
|                                     |            |        | B | 6 | 1  |       |      |
| Phthalates & phthalate alternatives | Phthalates | MEHP   | A | 6 | 5  | 32    | 30.2 |
|                                     |            |        | B | 6 | 1  |       |      |
| Phthalates & phthalate alternatives | Phthalates | MEP    | A | 6 | 1  | 34    | 8.3  |
|                                     |            |        | B | 6 | 1  |       |      |

|                                     |                                  |           |   |   |    |       |      |
|-------------------------------------|----------------------------------|-----------|---|---|----|-------|------|
| Phthalates & phthalate alternatives | Phthalates                       | MHiDP     | A | 6 | 4  | 32    | 16.4 |
|                                     |                                  |           | B | 6 | 4  |       |      |
| Phthalates & phthalate alternatives | Phthalates                       | MiPP/MPrP | A | 0 | NC | 13    | 50.6 |
|                                     |                                  |           | B | 0 | NC |       |      |
| Phthalates & phthalate alternatives | Phthalates                       | MMP       | A | 0 | NC | 18    | 41.9 |
|                                     |                                  |           | B | 0 | NC |       |      |
| Phthalates & phthalate alternatives | Phthalates                       | MnBP/MiBP | A | 6 | 1  | 34    | 11.1 |
|                                     |                                  |           | B | 6 | 1  |       |      |
| Phthalates & phthalate alternatives | Phthalates                       | MOP       | A | 0 | NC | 7     | 60.4 |
|                                     |                                  |           | B | 0 | NC |       |      |
| Phthalates & phthalate alternatives | Phthalates                       | MPeP      | A | 0 | NC | n < 5 | 25.4 |
|                                     |                                  |           | B | 0 | NC |       |      |
| Phthalates & phthalate alternatives | Terephthalates                   | MBzTP     | A | 0 | NC | 0     | NC   |
|                                     |                                  |           | B | 0 | NC |       |      |
| Phthalates & phthalate alternatives | Terephthalates                   | METP      | A | 0 | NC | 0     | NC   |
|                                     |                                  |           | B | 0 | NC |       |      |
| Phthalates & phthalate alternatives | Terephthalates                   | MTBTP     | A | 0 | NC | < 5   | 17.3 |
|                                     |                                  |           | B | 0 | NC |       |      |
| Polycyclic aromatic hydrocarbons    | Polycyclic aromatic hydrocarbons | FLUOs     | A | 6 | 3  | 16    | 25.5 |
|                                     |                                  |           | B | 6 | 1  |       |      |
| Polycyclic aromatic hydrocarbons    | Polycyclic aromatic hydrocarbons | NAPs      | A | 6 | 3  | 34    | 11.4 |
|                                     |                                  |           | B | 6 | 2  |       |      |
| Polycyclic aromatic hydrocarbons    | Polycyclic aromatic hydrocarbons | PHENs     | A | 0 | NC | 17    | 20.1 |
|                                     |                                  |           | B | 0 | NC |       |      |

|                                  |                                  |       |   |   |    |       |      |
|----------------------------------|----------------------------------|-------|---|---|----|-------|------|
| Polycyclic aromatic hydrocarbons | Polycyclic aromatic hydrocarbons | 1-OHP | A | 0 | NC | n < 5 | 18.3 |
|                                  |                                  |       | B | 0 | NC |       |      |

2,4-D, 2,4-dichlorophenoxyacetic acid; 2,4,5-T, 2,4,5-trichlorophenoxyacetic acid; 4-OHBP, 4-hydroxybenzophenone; ATZ, atrazine; BDCIPP, bis(1,3-dichloro-2-propyl) phosphate; BP1, benzophenone-1; BP3, benzophenone-3; BP8, 2,2'-dihydroxy-methoxybenzophenone; BPA, bisphenol A; BPF, bisphenol F; BPS, bisphenol S; BPZ, bisphenol Z; BuPB, butyl paraben; BzPB, benzyl paraben; CLO, clothianidin; DCCA, 3-(2,-di-chlorovinyl)-2,2-dimethyl-cyclopropane-1-carboxylic acid;  $\Sigma$ DEHP, molar sum of di-2-ethylhexyl phthalate metabolites;  $\Sigma$ DiDP, molar sum of di-iso-decyl phthalate metabolites;  $\Sigma$ DINCH, molar sum of di-iso-nonyl-cyclohexane-1,2-dicarboxylic acid metabolites;  $\Sigma$ DPHP, molar sum of di-(2-propylheptyl) phthalate metabolites; DPHP, diphenyl phosphate; EtPB, ethyl paraben; FLUOs, composite of 2-, 3-, and 9-hydroxyfluorene; FPBA, 4-fluoro-3-phenoxybenzoic acid; IMI, imidacloprid; MBzP, monobenzyl phthalate; MEP, monoethyl phthalate; MePB, methyl paraben; MHPP, mono-2-heptyl phthalate; MiPP/MPrP, composite of mono-isopropyl phthalate and mono-propyl phthalate; MMP = monomethyl phthalate; MnBP/MiBP = composite of mono-n-butyl phthalate and mono-iso-butyl phthalate; MOP, mono-n-octyl phthalate; NAPs, composite of 1- and 2-hydroxynaphthalene; NDMA, N-desmethyl acetamiprid; NIT, nitenpyram; PCP, pentachlorophenol; PHENs, composite of 1-, 2-, 3-, 4-, and 9-hydroxyphenanthrene; PNP, 4-nitrophenol; PrPB, propyl paraben; SUF, sulfoxaflo; TCC, triclocarban; TCP, 3,5,6-trichloro-2-pyridinol; TEP, triethyl phosphate; THX, thiamethoxam; TnBP/TiBP, composite of tri-n-butyl phosphate and tri-iso-butyl phosphate.

**Table S4.** Sociodemographic characteristics of pregnant women in the study sample, 9 participating cohorts, and 68 ECHO cohorts. All statistics are sample size (%) unless noted otherwise.

| <b>Demographic characteristics</b>                           | <b>Study sample<br/>(n = 171)</b> | <b>Participating cohorts<br/>(n = 7,420)</b> |
|--------------------------------------------------------------|-----------------------------------|----------------------------------------------|
| Age at delivery (years); mean (SD)                           | 29.5 (5.3)                        | 30.7 (5.5)                                   |
| Missing                                                      | 0                                 | 1,192                                        |
| Age at delivery category                                     |                                   |                                              |
| < 25                                                         | 35 (20)                           | 945 (15)                                     |
| 25 to < 30                                                   | 51 (30)                           | 1,572 (25)                                   |
| 30 to < 35                                                   | 47 (28)                           | 2,096 (34)                                   |
| ≥ 35                                                         | 38 (22)                           | 1,615 (26)                                   |
| Missing                                                      | 0                                 | 1,192                                        |
| Race/ethnicity                                               |                                   |                                              |
| Non-Hispanic White                                           | 57 (34)                           | 3,300 (46)                                   |
| Non-Hispanic Black/African American                          | 34 (20)                           | 786 (11)                                     |
| Non-Hispanic Other or multiple race                          | 11 (6)                            | 436 (6)                                      |
| Hispanic                                                     | 68 (40)                           | 2,599 (37)                                   |
| Missing                                                      | 1                                 | 299                                          |
| Highest educational attainment                               |                                   |                                              |
| Less than high school                                        | 16 (10)                           | 413 (7)                                      |
| High school degree, GED, or equivalent                       | 28 (17)                           | 972 (17)                                     |
| Some college, Associate's degree, or trade/vocational school | 45 (27)                           | 1,293 (23)                                   |
| Bachelor's degree                                            | 36 (22)                           | 1,638 (29)                                   |
| Master's, professional, or doctorate degree                  | 39 (24)                           | 1,393 (24)                                   |
| Missing                                                      | 7                                 | 1,711                                        |
| Marital status                                               |                                   |                                              |
| Single; partnered, not living together                       | 45 (27)                           | 1,045 (18)                                   |
| Widowed; separated; divorced                                 | 8 (5)                             | 325 (6)                                      |
| Married or living with a partner                             | 112 (68)                          | 4,388 (76)                                   |
| Missing                                                      | 6                                 | 1,662                                        |
| Pre- or early pregnancy BMI (kg/m <sup>2</sup> ); mean (SD)  | 26.4 (6.5)                        | 26.4 (6.4)                                   |
| Missing                                                      | 12                                | 1,667                                        |
| Year of delivery                                             |                                   |                                              |
| 1980 – 1989                                                  | 0 (0)                             | 0 (0)                                        |

|             |               |            |
|-------------|---------------|------------|
| 1990 – 1999 | 0 (0)         | 0 (0)      |
| 2000 – 2009 | < 5 (< 2%)    | 204 (3)    |
| 2010 – 2021 | > 166 (> 98%) | 7,152 (97) |
| Missing     | 0             | 64         |

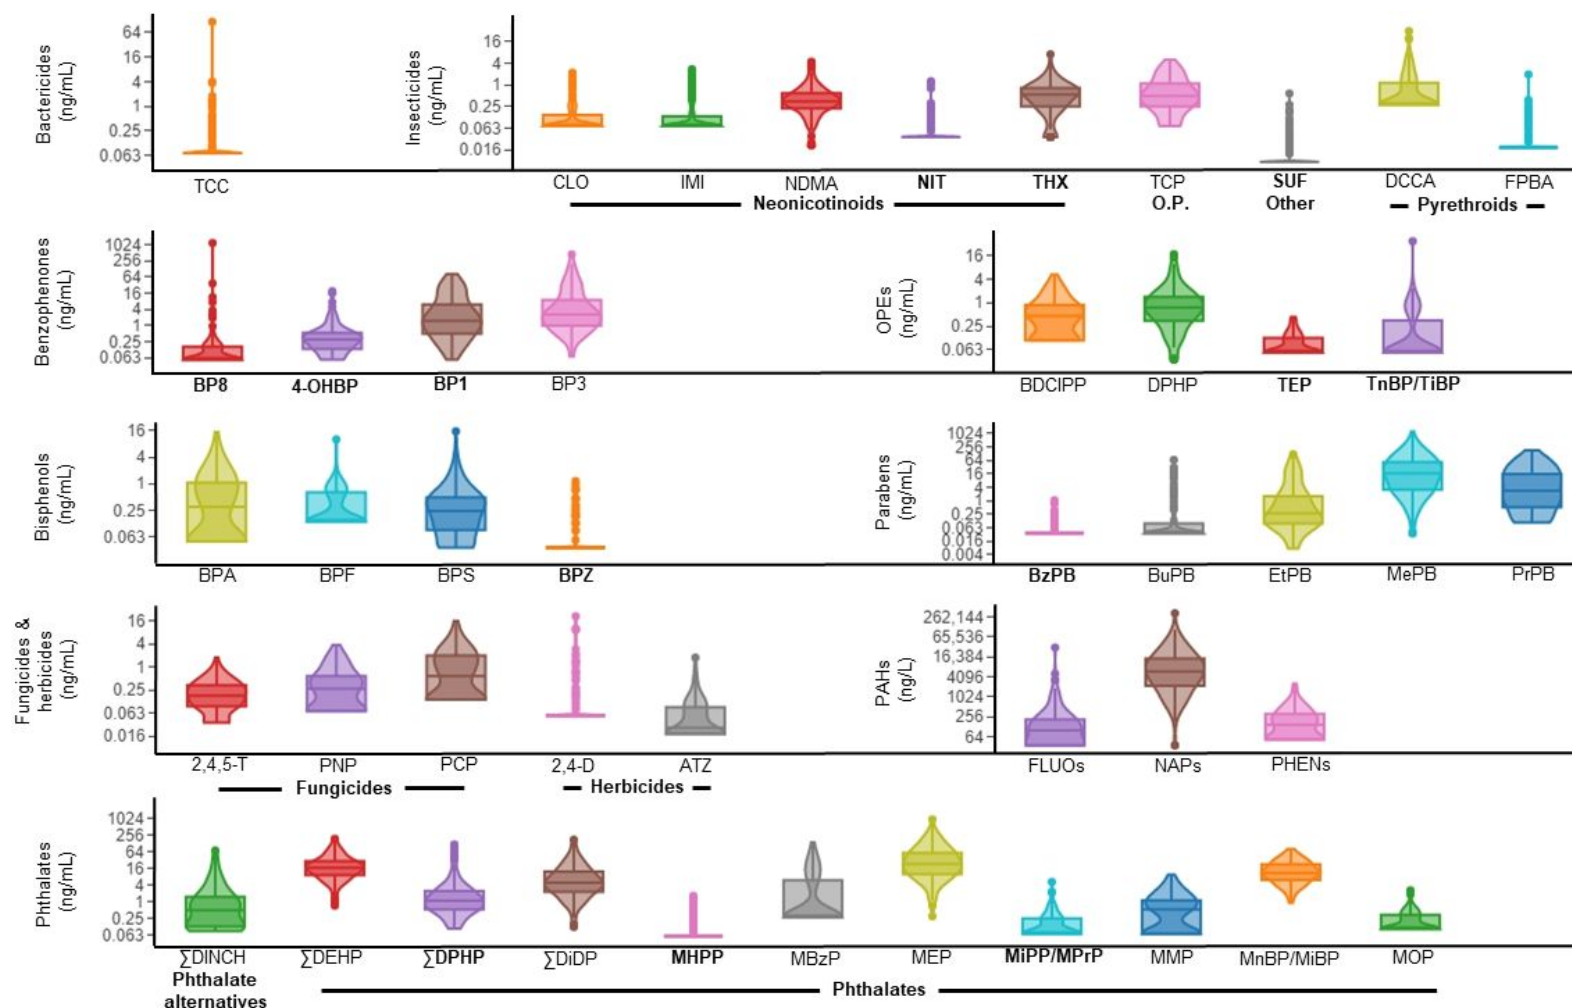

**Figure S1.** Violin plot of  $\log_2$ -transformed urinary analyte concentrations measured among 171 pregnant women in ECHO. Includes analytes detected in at least three cohorts and 10% of the overall study sample. Values below the limit of detection (LOD) were set to the  $\text{LOD}/\sqrt{2}$ . Bolding indicates analytes not previously included in NHANES biomonitoring. 2,4-D, 2,4-dichlorophenoxyacetic acid; 2,4,5-T, 2,4,5-trichlorophenoxyacetic acid; 4-OHBP, 4-hydroxybenzophenone; ATZ, atrazine; BDCIPP, bis(1,3-dichloro-2-propyl) phosphate; BP1, benzophenone-1; BP3, benzophenone-3; BP8, 2,2'-dihydroxy-methoxybenzophenone; BPA, bisphenol A; BPF, bisphenol F; BPS, bisphenol S; BPZ, bisphenol Z; BuPB, butyl paraben; BzPB, benzyl paraben; CLO, clothianidin; DCCA, 3-(2,-di-



chlorovinyl)-2,2-dimethyl-cyclopropane-1-carboxylic acid;  $\Sigma$ DEHP, molar sum of di-2-ethylhexyl phthalate metabolites;  $\Sigma$ DiDP, molar sum of di-iso-decyl phthalate metabolites;  $\Sigma$ DINCH, molar sum of di-iso-nonyl-cyclohexane-1,2-dicarboxylic acid metabolites;  $\Sigma$ DPHP, molar sum of di-(2-propylheptyl) phthalate metabolites; DPHP, diphenyl phosphate; EtPB, ethyl paraben; FLUOs, composite of 2-, 3-, and 9-hydroxyfluorene; FPBA, 4-fluoro-3-phenoxybenzoic acid; IMI, imidacloprid; MBzP, monobenzyl phthalate; MEP, monoethyl phthalate; MePB, methyl paraben; MHPP, mono-2-heptyl phthalate; MiPP/MPrP, composite of mono-isopropyl phthalate and mono-propyl phthalate; MMP = monomethyl phthalate; MnBP/MiBP = composite of mono-n-butyl phthalate and mono-iso-butyl phthalate; MOP, mono-n-octyl phthalate; NAPs, composite of 1- and 2-hydroxynaphthalene; NDMA, N-desmethyl acetamiprid; NIT, nitenpyram; PCP, pentachlorophenol; PHENs, composite of 1-, 2-, 3-, 4-, and 9-hydroxyphenanthrene; PNP, 4-nitrophenol; PrPB, propyl paraben; SUF, sulfoxaflo; TCC, triclocarban; TCP, 3,5,6-trichloro-2-pyridinol; TEP, triethyl phosphate; THX, thiamethoxam; TnBP/TiBP, composite of tri-n-butyl phosphate and tri-iso-butyl phosphate
